# Supplementary material for: The impact of gaseous degradation on the equilibrium state of gas/particle partitioning of semi-volatile organic compounds
Source: Copernicus journal article supplement (doi:10.5194/egusphere-2023-2376), 2023-12-04
Supplement: Supplementary file 1 [file egusphere-2023-2376-supplement.pdf]

## **The impact of gaseous degradation on the equilibrium state of gas/particle partitioning of semi-volatile organic compounds**

Fu-Jie Zhu<sup>a,b,c</sup>, Zi-Feng Zhang<sup>a,b</sup>, Li-Yan Liu<sup>a,b</sup>, Pu-Fei Yang<sup>a,b</sup>, Peng-Tuan Hu<sup>a,d</sup>,  
Geng-Bo Ren<sup>c</sup>, Meng Qin<sup>a,b</sup>, Wan-Li Ma<sup>a,b,\*</sup>

<sup>a</sup> International Joint Research Center for Persistent Toxic Substances (IJRC-PTS), State Key Laboratory of Urban Water Resource and Environment, Harbin Institute of Technology, Harbin 150090, China

<sup>b</sup> Heilongjiang Provincial Key Laboratory of Polar Environment and Ecosystem (HPKL-PEE), Harbin 150090, China

<sup>c</sup> School of Energy and Environmental Engineering, Hebei University of Technology, Tianjin 300401, China

<sup>d</sup> School of Environment, Key Laboratory for Yellow River and Huai River Water Environment and Pollution Control, Ministry of Education, Henan Normal University, Xinxiang 453007, China

---

\*Corresponding author. International Joint Research Center for Persistent Toxic Substances (IJRC-PTS), State Key Laboratory of Urban Water Resource and Environment, Harbin Institute of Technology, 73 Huanghe Road, Nangang District, Harbin 150090, Heilongjiang, China.  
Email address: [mawanli002@163.com](mailto:mawanli002@163.com)

## Contents

### Tables

|                                                                                                                                                            |    |
|------------------------------------------------------------------------------------------------------------------------------------------------------------|----|
| Table S1. Information of 49 Me-PAHs .....                                                                                                                  | 3  |
| Table S2. Values and the calculation parameters for <i>A</i> and <i>B</i> of several Me-PAHs.....                                                          | 6  |
| Table S3. Calculation parameters for $\log K_{OA}$ (25°C) and $\Delta H_{OA}$ (kJ/mol).....                                                                | 8  |
| Table S4. The geometric mean values of the N/D ratios for different phases Me-PAHs in different seasons .....                                              | 9  |
| Table S5. Gaseous degradation rate ( $\text{h}^{-1}$ ) (hydroxyl radicals reaction) of Me-Naps and U-PAHs calculated using half-lives from EPI suite ..... | 11 |

### Figures

|                                                                                                                                                     |    |
|-----------------------------------------------------------------------------------------------------------------------------------------------------|----|
| Fig. S1. Chromatographic separation of 49 Me-PAHs in standard solutions (100 ng/mL)                                                                 | 13 |
| Fig. S2. Comparison of the values of N/D ratios for individual Me-PAHs between particle phase and gas phase .....                                   | 14 |
| Fig. S3. Comparison the regression lines of $\log K_p'$ vs. $\log K_{OA}$ of total Me-PAHs from daytime and nighttime .....                         | 15 |
| Fig. S4. Comparison of the regression lines of $\log K_p'$ against $\log K_{OA}$ between daytime and nighttime for part of individual Me-PAHs ..... | 16 |
| Fig. S5. The fluxes related to the gas and particle phase in the six-compartment model....                                                          | 17 |

**Table S1. Information of 49 Me-PAHs**

| Compounds                              | Abbreviations  | Categories | Rings | Quantitative ions | Qualitative ions | Retention time (min) | IDLs <sup>a</sup> (ng) | DR <sup>b</sup> |
|----------------------------------------|----------------|------------|-------|-------------------|------------------|----------------------|------------------------|-----------------|
| 2-Methylnaphthalene                    | 2-MeNap        | Me         | 2     | 142               | 141              | 6.858                | 0.0384                 | 84%             |
| 1-Methylnaphthalene                    | 1-MeNap        | Me         | 2     | 142               | 141              | 6.991                | 0.0505                 | 85%             |
| <u>2,6&amp;2,7-Dimethylnaphthalene</u> | 2,6&2,7-DMeNap | Me         | 2     | 156               | 141              | 7.710                | 0.0154                 | 46%             |
| 1,3-Dimethylnaphthalene                | 1,3-DMeNap     | Me         | 2     | 156               | 141              | 7.844                | 0.0904                 | 70%             |
| 1,6-Dimethylnaphthalene                | 1,6-DMeNap     | Me         | 2     | 156               | 141              | 7.886                | 0.0857                 | 73%             |
| <u>1,4&amp;1,5-Dimethylnaphthalene</u> | 1,4&1,5-DMeNap | Me         | 2     | 156               | 141              | 8.086                | 0.0467                 | 74%             |
| 1,2-Dimethylnaphthalene                | 1,2-DMeNap     | Me         | 2     | 156               | 141              | 8.220                | 0.138                  | 68%             |
| 1,8-Dimethylnaphthalene                | 1,8-DMeNap     | Me         | 2     | 156               | 141              | 8.462                | 0.126                  | -               |
| 2-Methylphenanthrene                   | 2-MePhe        | Me         | 3     | 192               | 191              | 17.476               | 0.310                  | 96%             |
| 2-Methylantracene                      | 2-MeAnt        | Me         | 3     | 192               | 191              | 17.648               | 0.240                  | 88%             |
| 1-Methylantracene                      | 1-MeAnt        | Me         | 3     | 192               | 191              | 17.812               | 0.207                  | -               |
| 1-Methylphenanthrene                   | 1-MePhe        | Me         | 3     | 192               | 191              | 17.855               | 0.239                  | 98%             |
| 9-Methylantracene                      | 9-MeAnt        | Me         | 3     | 192               | 191              | 18.321               | 0.432                  | 56%             |
| 3,6-Dimethylphenanthrene               | 3,6-DMePhe     | Me         | 3     | 206               | 191              | 18.847               | 0.134                  | -               |
| 2,3-Dimethylantracene                  | 2,3-DMeAnt     | Me         | 3     | 206               | 191              | 19.606               | 0.201                  | -               |
| 9-Methyl-9-phenylfluorene              | 9-Me-9-PFlu    | Me         | 4     | 241               | 256              | 20.015               | 0.0335                 | -               |
| 9,10-Dimethylantracene                 | 9,10-DMeAnt    | Me         | 3     | 206               | 191              | 20.155               | 0.245                  | -               |
| 2-Methylfluoranthene                   | 2-MeFluo       | Me         | 4     | 216               | 215              | 20.646               | 0.0636                 | 97%             |
| 1-Methylpyrene                         | 1-MePyr        | Me         | 4     | 216               | 215              | 21.453               | 0.0620                 | 97%             |
| 1-Methylbenzo[c]phenanthrene           | 1-MeBcP        | Me         | 4     | 242               | 241              | 22.584               | 0.0570                 | 92%             |
| 2-Methylbenzo[c]phenanthrene           | 2-MeBcP        | Me         | 4     | 242               | 241              | 23.230               | 0.0275                 | 84%             |

*continued Table S1*

| Compounds                                                                 | Abbreviations         | Categories | Rings | Quantitative ions | Qualitative ions | Retention time (min) | IDLs <sup>a</sup> (ng) | DR <sup>b</sup> |
|---------------------------------------------------------------------------|-----------------------|------------|-------|-------------------|------------------|----------------------|------------------------|-----------------|
| 3-Methylbenzo[c]phenanthrene                                              | 3-MeBcP               | Me         | 4     | 242               | 241              | 23.623               | 0.0700                 | 84%             |
| 5-Methylbenzo[c]phenanthrene                                              | 5-MeBcP               | Me         | 4     | 242               | 241              | 23.800               | 0.0641                 | -               |
| 4-Methylbenzo[c]phenanthrene                                              | 4-MeBcP               | Me         | 4     | 242               | 241              | 23.846               | 0.0673                 | -               |
| <u>1&amp;2-Methylbenz[a]anthracene</u>                                    | 1&2-MeBaA             | Me         | 4     | 242               | 241              | 24.138               | 0.0367                 | 74%             |
| <u>7&amp;9-Methylbenz[a]anthracene</u>                                    | 7&9-MeBaA             | Me         | 4     | 242               | 241              | 24.254               | 0.0331                 | 70%             |
| <u>6&amp;4-Methylbenz[a]anthracene</u>                                    | 6&4-MeBaA             | Me         | 4     | 242               | 241              | 24.308               | 0.0313                 | 62%             |
| 1,12-Dimethylbenzo[c]phenanthrene                                         | 1,12-DMeBcP           | Me         | 4     | 256               |                  | 24.469               | 0.0607                 | -               |
| <u>5&amp;6&amp;4-Methylchrysene &amp; 3&amp;5-Methylbenz[a]anthracene</u> | 5&6&4-MeChr&3&5-MeBaA | Me         | 4     | 242               | 241              | 24.500               | 0.0214                 | 98%             |
| 10-Methylbenz[a]anthracene                                                | 10-MeBaA              | Me         | 4     | 242               | 241              | 24.893               | 0.103                  | -               |
| 5,8-Dimethylbenzo[c]phenanthrene                                          | 5,8-DMeBcP            | Me         | 4     | 256               | 239              | 25.270               | 0.0933                 | -               |
| 6,8-Dimethylbenz[a]anthracene                                             | 6,8-DMeBaA            | Me         | 4     | 256               | 239              | 25.462               | 0.0908                 | -               |
| 3,9-Dimethylbenz[a]anthracene                                             | 3,9-DMeBaA            | Me         | 4     | 256               | 239              | 25.578               | 0.108                  | 50%             |
| 7,12-Dimethylbenz[a]anthracene                                            | 7,12-DMeBaA           | Me         | 4     | 256               | 239              | 26.457               | 0.190                  | -               |
| 3-Methylcholanthrene                                                      | 3-Me-Cho              | Me         | 5     | 268               | 253              | 29.440               | 0.951                  | -               |
| 9-Methylbenzo[a]pyrene                                                    | 9-MeBaP               | Me         | 5     | 266               | 265              | 29.728               | 0.595                  | -               |
| 8-Methylbenzo[a]pyrene                                                    | 8-MeBaP               | Me         | 5     | 266               | 265              | 29.929               | 0.271                  | -               |
| <u>7&amp;10-Methylbenzo[a]pyrene</u>                                      | 7&10-MeBaP            | Me         | 5     | 266               | 265              | 30.252               | 0.590                  | -               |
| 7,10-Dimethylbenzo[a]pyrene                                               | 7,10-DMeBaP           | Me         | 5     | 280               | 131              | 33.153               | 0.505                  | -               |

Note: Underlined compounds represent that the instrumental method cannot achieve chromatographic separation for these compounds with same quantitative and qualitative ions

a, represents instrument detection limits

b, represents detection rate of all samples (include gaseous and particulate samples)

“-” represents the detection rate was below 30%

**Table S2. Values and the calculation parameters for *A* and *B* of several Me-PAHs**

| Compounds   | E <sup>a</sup> | S <sup>a</sup> | A <sup>a</sup> | B <sup>a</sup> | V <sup>a</sup> | L <sup>a</sup> | log <i>K</i> <sub>OA</sub> (25°C) <sup>b</sup> | Δ <i>H</i> <sub>OA</sub> (kJ/mol) <sup>b</sup> | <i>A</i> <sup>c</sup> | <i>B</i> <sup>c</sup> |
|-------------|----------------|----------------|----------------|----------------|----------------|----------------|------------------------------------------------|------------------------------------------------|-----------------------|-----------------------|
| 2-MeNap     | 1.3            | 0.81           | 0              | 0.25           | 1.2263         | 5.617          | 5.51                                           | 56.43                                          | -4.38                 | 2948                  |
| 1-MeNap     | 1.34           | 0.94           | 0              | 0.22           | 1.2263         | 5.802          | 5.73                                           | 57.16                                          | -4.28                 | 2986                  |
| 2,6-DMeNap  | 1.35           | 0.82           | 0              | 0.25           | 1.3672         | 6.146          | 6.01                                           | 61.26                                          | -4.72                 | 3200                  |
| 2,7-DMeNap  | 1.35           | 0.82           | 0              | 0.25           | 1.3672         | 6.147          | 6.01                                           | 61.27                                          | -4.72                 | 3201                  |
| 1,3-DMeNap  | 1.39           | 0.92           | 0              | 0.2            | 1.3672         | 6.236          | 6.1                                            | 61.07                                          | -4.60                 | 3190                  |
| 1,6-DMeNap  | 1.37           | 0.94           | 0              | 0.21           | 1.3672         | 6.347          | 6.23                                           | 62.11                                          | -4.65                 | 3244                  |
| 1,4-DMeNap  | 1.4            | 0.91           | 0              | 0.2            | 1.3672         | 6.339          | 6.19                                           | 62.12                                          | -4.69                 | 3245                  |
| 1,5-DMeNap  | 1.4            | 1.05           | 0              | 0.18           | 1.3672         | 6.545          | 6.45                                           | 63.08                                          | -4.60                 | 3295                  |
| 1,2-DMeNap  | 1.43           | 0.97           | 0              | 0.25           | 1.3672         | 6.473          | 6.38                                           | 63.51                                          | -4.75                 | 3318                  |
| 1,8-DMeNap  | 1.4            | 1.01           | 0              | 0.21           | 1.3672         | 6.653          | 6.55                                           | 64.64                                          | -4.78                 | 3377                  |
| 2-MePhe     | 2.06           | 1.25           | 0              | 0.29           | 1.5953         | 8.307          | 8.16                                           | 79.55                                          | -5.78                 | 4155                  |
| 2-MeAnt     | 2.29           | 1.3            | 0              | 0.31           | 1.5953         | 8.184          | 8.04                                           | 78.25                                          | -5.67                 | 4088                  |
| 1-MeAnt     | 2.29           | 1.3            | 0              | 0.3            | 1.5953         | 8.332          | 8.17                                           | 79.59                                          | -5.77                 | 4158                  |
| 1-MePhe     | 2.06           | 1.25           | 0              | 0.29           | 1.5953         | 8.408          | 8.26                                           | 80.53                                          | -5.85                 | 4207                  |
| 9-MeAnt     | 2.25           | 1.27           | 0              | 0.3            | 1.5953         | 8.438          | 8.27                                           | 80.79                                          | -5.88                 | 4220                  |
| 3,6-DMePhe  | 2.05           | 1.29           | 0              | 0.29           | 1.7362         | 8.7            | 8.56                                           | 82.89                                          | -5.96                 | 4330                  |
| 9,10-DMeAnt | 2.25           | 1.25           | 0              | 0.28           | 1.7362         | 9.283          | 9.04                                           | 88.67                                          | -6.50                 | 4632                  |
| 1-MePyr     | 2.81           | 1.7            | 0              | 0.26           | 1.7255         | 9.541          | 9.4                                            | 88.28                                          | -6.07                 | 4611                  |
| 1-MeBaA     | 2.99           | 1.7            | 0              | 0.35           | 1.9643         | 10.763         | 10.58                                          | 100.54                                         | -7.03                 | 5252                  |
| 7-MeBaA     | 2.99           | 1.7            | 0              | 0.35           | 1.9643         | 11.096         | 10.89                                          | 103.76                                         | -7.29                 | 5420                  |
| 4-MeBaA     | 2.99           | 1.7            | 0              | 0.35           | 1.9643         | 10.909         | 10.72                                          | 101.95                                         | -7.14                 | 5326                  |
| 5-MeChr     | 3.03           | 1.73           | 0              | 0.36           | 1.9643         | 10.905         | 10.73                                          | 101.82                                         | -7.11                 | 5319                  |

*continued Table S2*

| Compounds   | E <sup>a</sup> | S <sup>a</sup> | A <sup>a</sup> | B <sup>a</sup> | V <sup>a</sup> | L <sup>a</sup> | log $K_{OA}$ (25°C) <sup>b</sup> | $\Delta H_{OA}$ (kJ/mol) <sup>b</sup> | A <sup>c</sup> | B <sup>c</sup> |
|-------------|----------------|----------------|----------------|----------------|----------------|----------------|----------------------------------|---------------------------------------|----------------|----------------|
| 6-MeChr     | 3.03           | 1.73           | 0              | 0.36           | 1.9643         | 10.934         | 10.76                            | 102.1                                 | -7.13          | 5333           |
| 4-MeChr     | 3.03           | 1.73           | 0              | 0.36           | 1.9643         | 10.937         | 10.76                            | 102.13                                | -7.13          | 5335           |
| 7,12-DMeBaA | 2.99           | 1.65           | 0              | 0.35           | 2.1052         | 11.753         | 11.48                            | 110.19                                | -7.83          | 5756           |
| 3-MeCho     | 3.26           | 1.57           | 0              | 0.51           | 2.1375         | 12.482         | 12.19                            | 119.14                                | -8.68          | 6223           |

Note:

a, Ulrich, N., Endo, S., Brown, T.N., Watanabe, N., Bronner, G., Abraham, M.H., Goss, K.-U., UFZ-LSER database v 3.2.1 [Internet], Leipzig, Germany, Helmholtz Centre for Environmental Research-UFZ. 2017 [accessed on 09.08.2022]. Available from <http://www.ufz.de/lserd>

b, log  $K_{OA}$  (25°C) and  $\Delta H_{OA}$  (kJ/mol) were calculated using the parameters in **Table S1 and S2**.

c,  $B$  is calculated by the equation:  $B = \Delta H_{OA} / (\ln(10) * 8.314)$ ,  $A$  is calculated by the equation:  $A = \log K_{OA} (25^\circ\text{C}) - B / 298.15$

**Table S3. Calculation parameters for  $\log K_{OA}$  (25°C) and  $\Delta H_{OA}$  (kJ/mol)**

| Parameters               | e     | s     | a     | b    | v     | l    | constant | Equations                                                             | References |
|--------------------------|-------|-------|-------|------|-------|------|----------|-----------------------------------------------------------------------|------------|
| $\log K_{OA}$ (25°C)     | -0.21 | 0.56  | 3.51  | 0.75 |       | 0.94 | -0.15    | Parameter = l * L +<br>s * S + a * A + b *<br>B + e * E +<br>constant | [1]        |
| $\Delta H_{OA}$ (kJ/mol) |       | -6.04 | 53.66 | 9.19 | -1.57 | 9.66 | 6.67     | Parameter = l * L +<br>s * S + a * A + b *<br>B + v * V +<br>constant | [2]        |

## References:

- [1] Abraham, M. H.; Smith, R. E.; Luchtefeld, R.; Boorem, A. J.; Luo, R. S.; Acree, W. E. J. *Pharma. Sci.* 2010, 99 (3), 1500-1627
- [2] Mintz, C.; Burton, K.; Ladlie, T.; Clark, M.; Acree Jr, W. E.; Abraham, M. H. *Thermochim. Acta* 2008, 470 (1-2), 67-76.



**Table S4. The geometric mean values of the N/D ratios for different phases Me-PAHs in different seasons**

|                | Total Phase |                |                    | Particle Phase |                |                    | Gas Phase   |                |                    |
|----------------|-------------|----------------|--------------------|----------------|----------------|--------------------|-------------|----------------|--------------------|
|                | All season  | Heating season | Non-heating season | All season     | Heating season | Non-heating season | All season  | Heating season | Non-heating season |
| 2-MeNap        | <b>2.67</b> | <b>2.14</b>    | <b>3.30</b>        | 0.842          | <b>0.561</b>   | 2.23               | <b>2.73</b> | <b>2.21</b>    | <b>3.33</b>        |
| 1-MeNap        | <b>3.16</b> | <b>2.22</b>    | 4.41               | 0.819          | <b>0.493</b>   | 2.47               | <b>3.25</b> | <b>2.30</b>    | <b>4.51</b>        |
| 2,6&2,7-DMeNap | <b>2.19</b> | <b>2.02</b>    | <b>7.30</b>        | 0.347          | 0.347          | -                  | <b>2.37</b> | <b>2.19</b>    | 7.30               |
| 1,3-DMeNap     | <b>2.97</b> | <b>2.01</b>    | <b>4.27</b>        | 0.588          | 0.499          | 3.03               | <b>3.03</b> | <b>2.11</b>    | <b>4.27</b>        |
| 1,6-DMeNap     | <b>2.76</b> | <b>1.93</b>    | <b>3.85</b>        | 0.604          | 0.528          | 1.18               | <b>2.83</b> | <b>2.03</b>    | <b>3.87</b>        |
| 1,4&1,5-DMeNap | <b>2.67</b> | <b>1.88</b>    | <b>3.72</b>        | 0.501          | <b>0.429</b>   | 3.28               | <b>2.73</b> | <b>1.96</b>    | <b>3.72</b>        |
| 1,2-DMeNap     | <b>2.45</b> | 1.75           | <b>3.35</b>        | 0.557          | 0.557          | -                  | <b>2.49</b> | <b>1.82</b>    | <b>3.35</b>        |
| 2-MePhe        | 1.11        | 1.12           | 1.10               | 1.09           | 0.984          | 1.24               | 1.11        | 1.14           | 1.09               |
| 2-MeAnt        | 1.20        | 1.32           | 1.11               | 1.68           | 1.34           | <b>2.94</b>        | 1.04        | 1.05           | 1.03               |
| 1-MePhe        | 1.15        | 1.12           | 1.18               | 1.08           | 0.975          | 1.22               | 1.15        | 1.14           | 1.17               |
| 9-MeAnt        | <b>2.07</b> | 2.49           | 1.38               | 2.04           | 2.04           | -                  | <b>1.89</b> | 2.78           | 1.28               |
| 2-MeFluo       | 1.36        | 1.23           | 1.50               | 1.61           | 1.24           | <b>2.05</b>        | 1.05        | 0.68           | 1.46               |
| 1-MePyr        | <b>1.65</b> | 1.39           | <b>1.95</b>        | <b>1.97</b>    | 1.40           | <b>2.71</b>        | <b>1.31</b> | 0.81           | <b>1.89</b>        |
| 1-MeBcP        | 1.93        | 1.25           | <b>2.88</b>        | 1.83           | 1.30           | <b>2.63</b>        | <b>1.86</b> | 1.01           | <b>2.79</b>        |
| 2-MeBcP        | 1.73        | 1.26           | <b>2.34</b>        | <b>1.90</b>    | 1.27           | <b>2.78</b>        | 1.56        | 1.12           | 1.72               |
| 3-MeBcP        | 1.61        | 1.27           | <b>2.01</b>        | 1.67           | 1.26           | <b>2.24</b>        | 1.45        | 1.15           | 1.54               |
| 1&2-MeBaA      | <b>2.04</b> | 1.57           | <b>2.61</b>        | <b>2.08</b>    | 1.56           | <b>2.72</b>        | 1.79        | 0.87           | 2.70               |
| 7&9-MeBaA      | 1.69        | 1.35           | 2.11               | 1.61           | 1.34           | <b>1.99</b>        | 1.22        | 1.48           | 1.15               |
| 6&4-MeBaA      | <b>1.85</b> | 1.44           | <b>2.33</b>        | <b>1.84</b>    | 1.44           | <b>2.31</b>        | 1.22        | -              | 1.22               |

*continued Table S4*

|                        | Total Phase |                |                    | Particle Phase |                |                    | Gas Phase  |                |                    |
|------------------------|-------------|----------------|--------------------|----------------|----------------|--------------------|------------|----------------|--------------------|
|                        | All season  | Heating season | Non-heating season | All season     | Heating season | Non-heating season | All season | Heating season | Non-heating season |
| 5&6&4-MeChr&3&5-MeBaA  | <b>1.90</b> | 1.46           | <b>2.42</b>        | <b>2.01</b>    | 1.46           | <b>2.77</b>        | 1.31       | 1.17           | 1.46               |
| 3,9-DMeBaA             | <b>1.86</b> | 1.72           | <b>2.01</b>        | <b>1.86</b>    | 1.72           | <b>2.01</b>        | -          | -              | -                  |
| Number of significance | 13          | 6              | 14                 | 6              | 3              | 11                 | 10         | 7              | 8                  |

Note: The bold Numbers represent the mean concentrations of Me-PAHs in nighttime were significant different with that in daytime ( $p < 0.05$ ).

**Table S5. Gaseous degradation rate ( $\text{h}^{-1}$ ) (hydroxyl radicals reaction) of Me-Naps and U-PAHs calculated using half-lives from EPI suite**

| PAHs           | $k_{\text{deg\_25}}$ | $k_{\text{deg\_min}}$ | $k_{\text{deg\_max}}$ |
|----------------|----------------------|-----------------------|-----------------------|
| 2-MeNap        | 0.305                | 0.0787                | 0.417                 |
| 1-MeNap        | 0.305                | 0.0787                | 0.417                 |
| 2,6&2,7-DMeNap | 0.375                | 0.0966                | 0.512                 |
| 1,3-DMeNap     | 0.375                | 0.0966                | 0.512                 |
| 1,6-DMeNap     | 0.375                | 0.0966                | 0.512                 |
| 1,4&1,5-DMeNap | 0.375                | 0.0966                | 0.512                 |
| 1,2-DMeNap     | 0.375                | 0.0966                | 0.512                 |
| Acy            | 0.408                | 0.118                 | 0.557                 |
| Ace            | 0.361                | 0.105                 | 0.493                 |
| Flu            | 0.0478               | 0.0139                | 0.0653                |

Note: The gaseous degradation rate of PAHs can be calculated using the half-lives of PAHs:  $k_{\text{degi}} = \ln(2)/t_{1/2}$ .

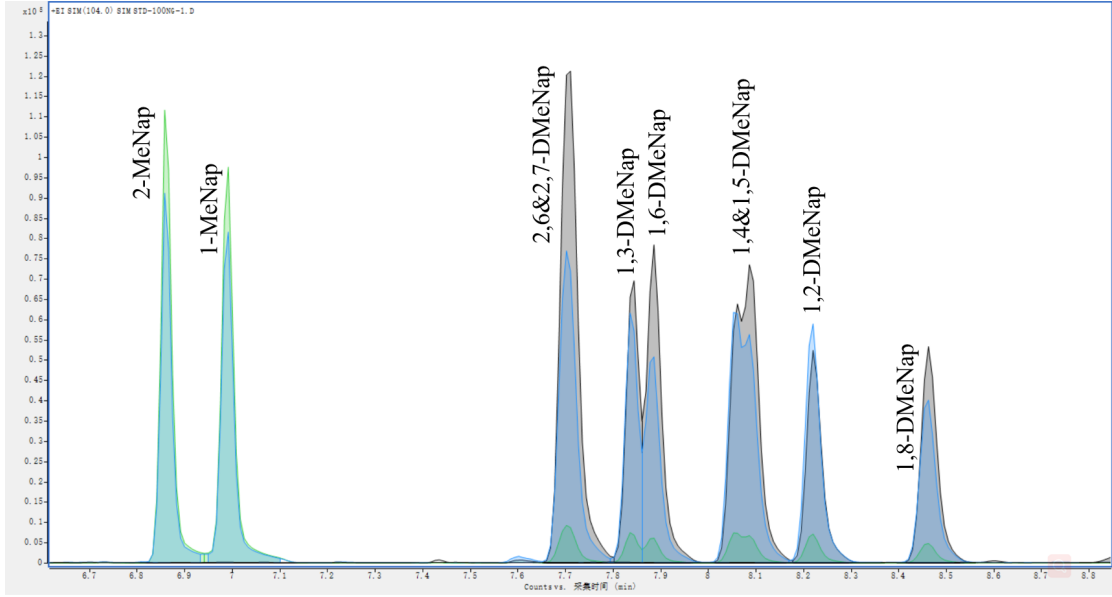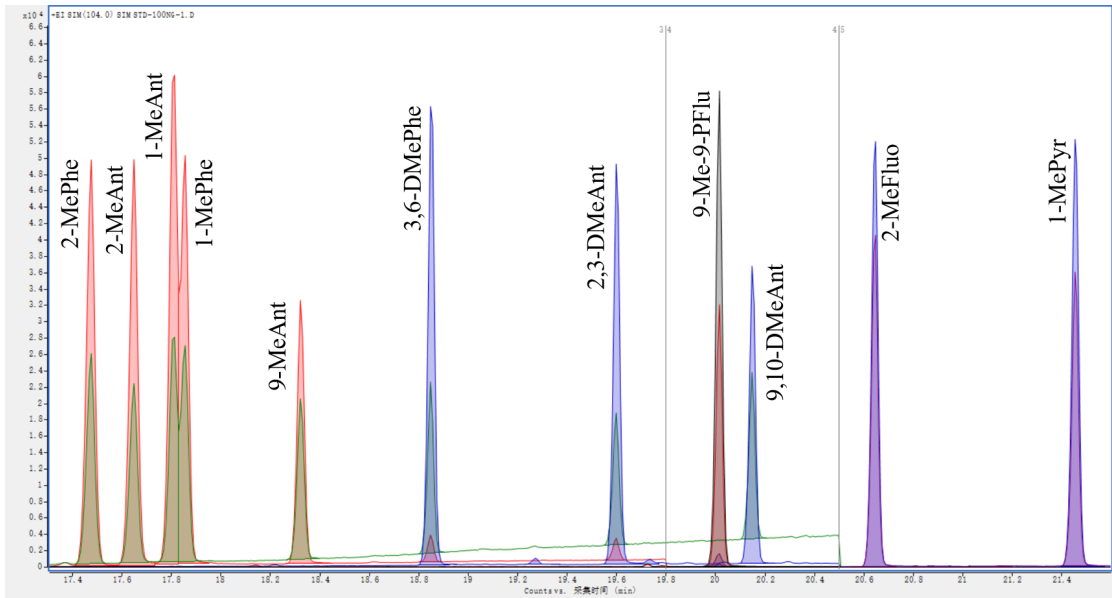

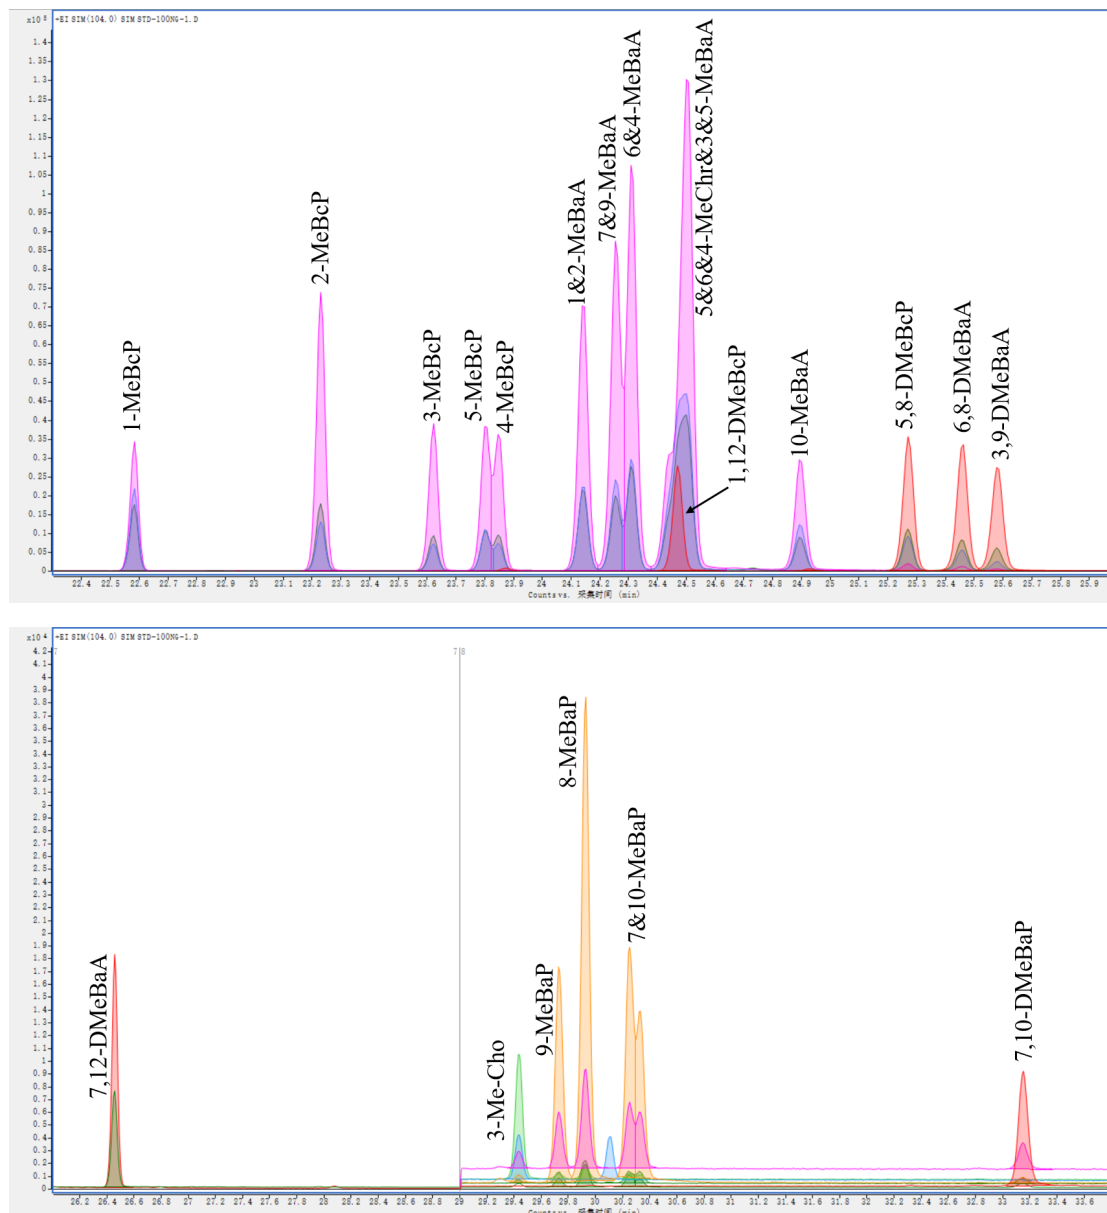

**Fig. S1. Chromatographic separation of 49 Me-PAHs in standard solutions (100 ng/mL)**

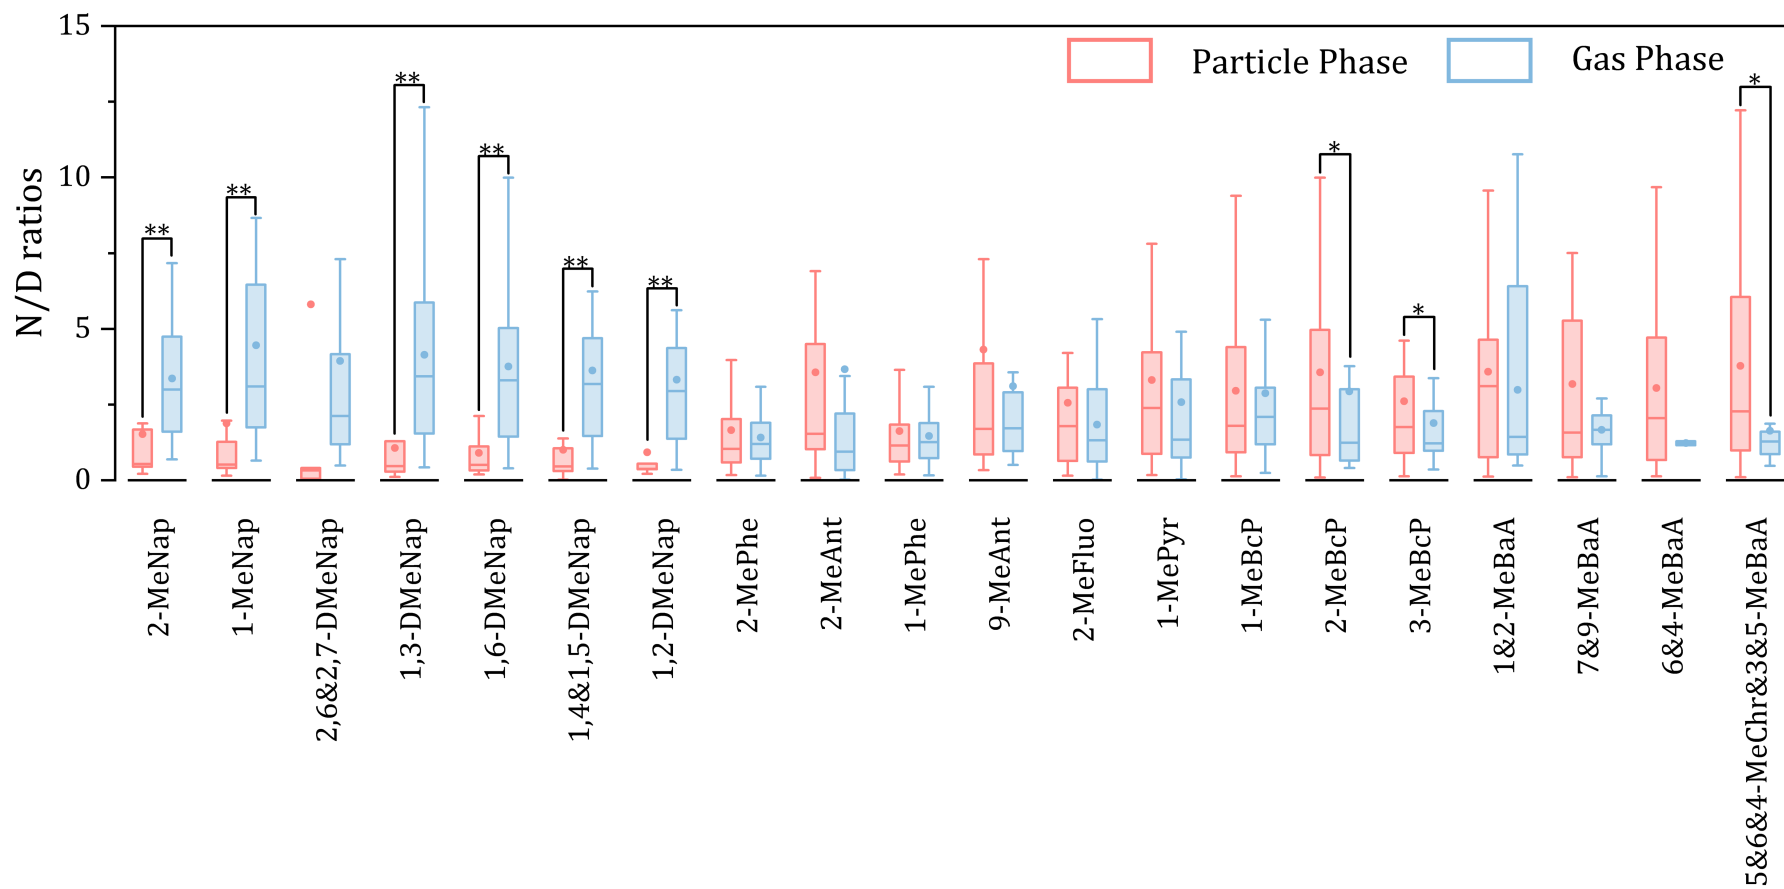

**Fig. S2. Comparison of the values of N/D ratios for individual Me-PAHs between particle phase and gas phase**

(Note: \* and \*\* represent that the differences are significant at 0.05 and 0.01 level.)

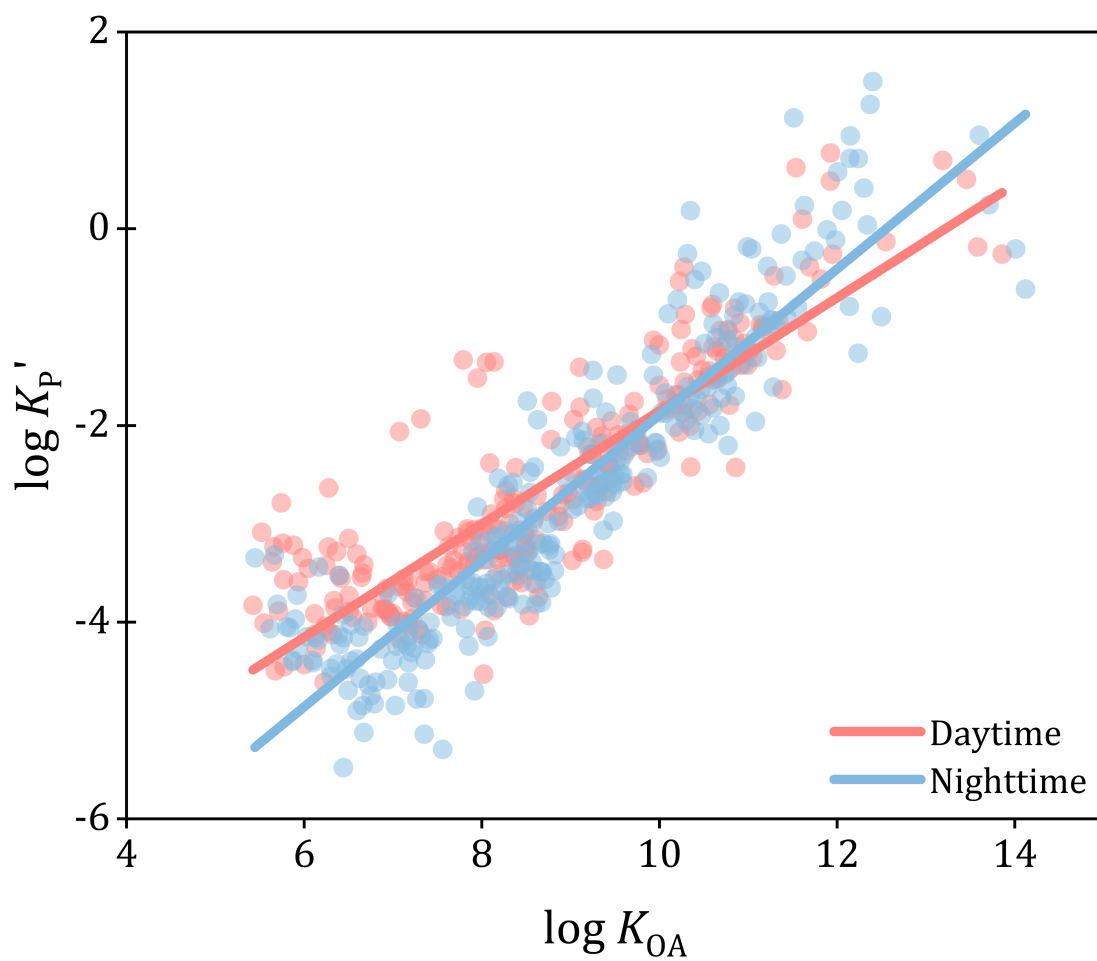

**Fig. S3. Comparison the regression lines of  $\log K_{P'}$  vs.  $\log K_{OA}$  of total Me-PAHs from daytime and nighttime**

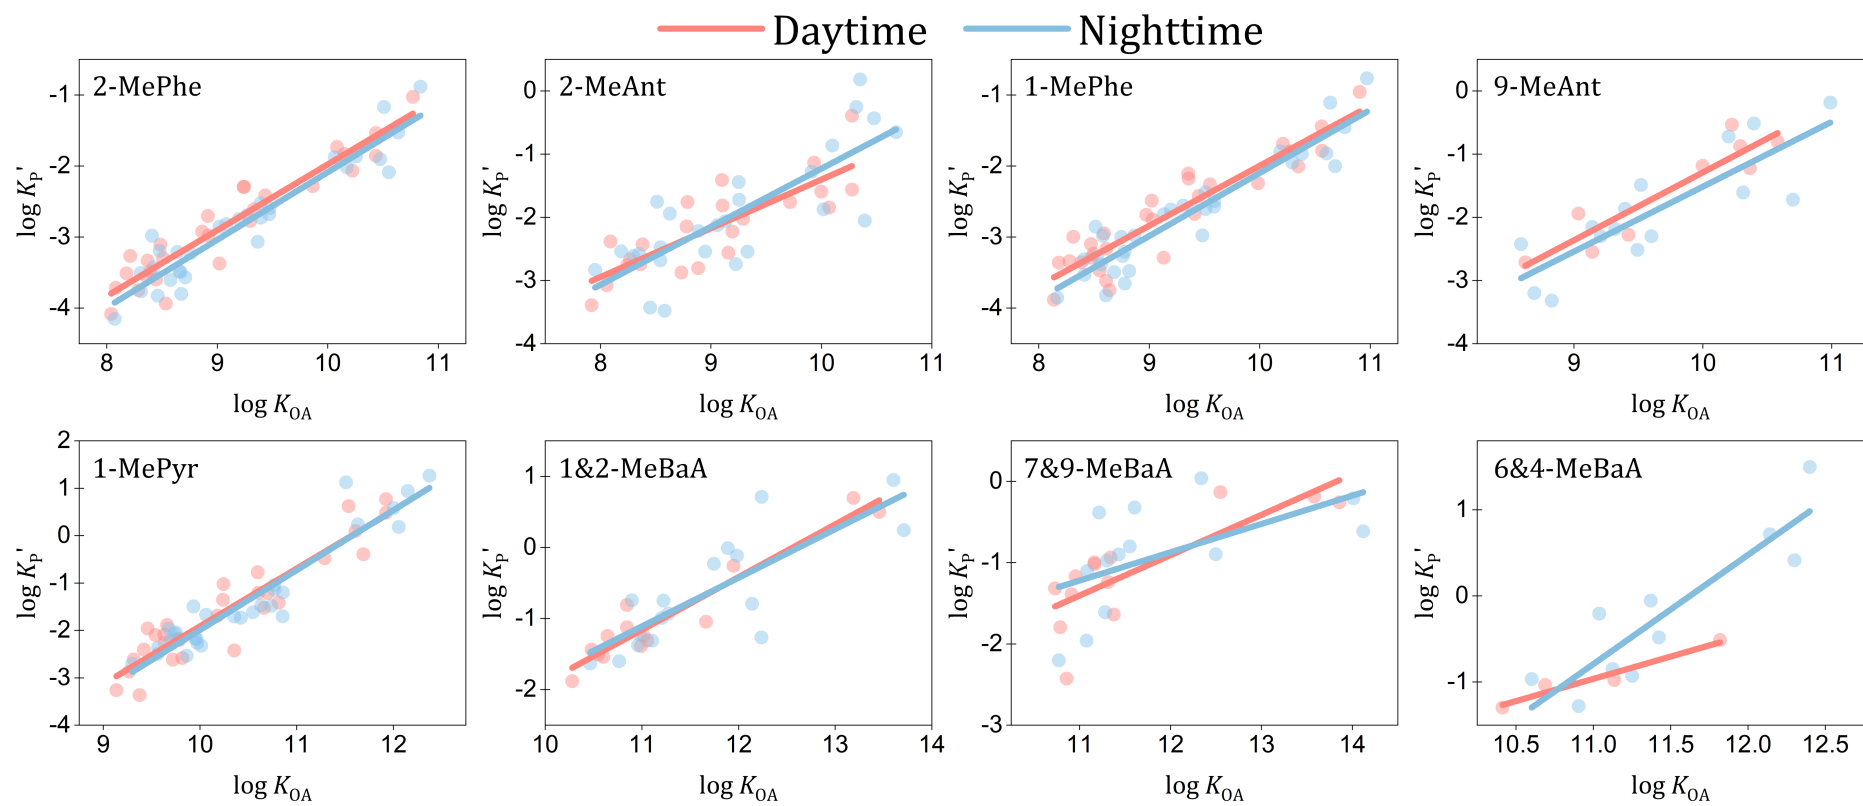

**Fig. S4. Comparison of the regression lines of  $\log K_{P'}$  against  $\log K_{OA}$  between daytime and nighttime for part of individual Me-PAHs**



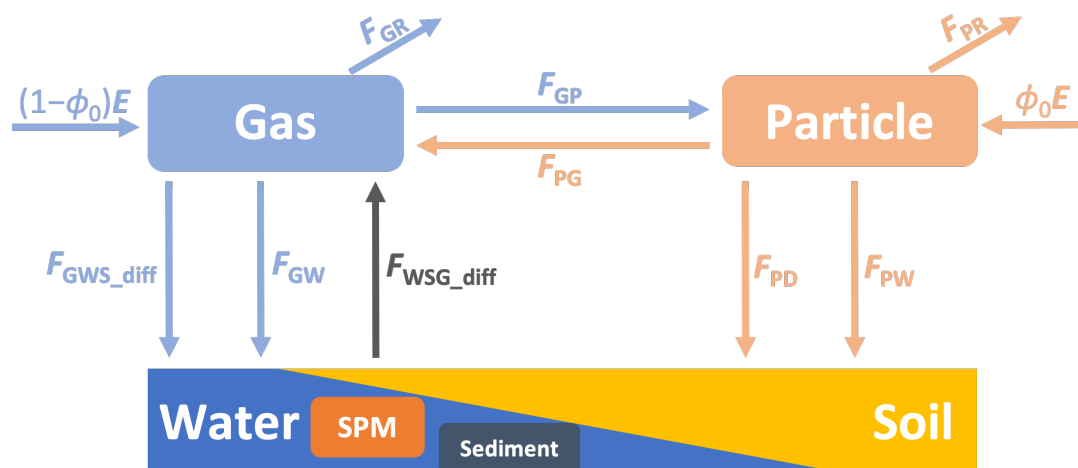

**Fig. S5. The fluxes related to the gas and particle phase in the six-compartment model**

(Note:  $F_{GR}$ : degradation flux of gas phase PAHs;  $F_{PR}$ : degradation flux of particle phase PAHs;  $F_{GP}$ : migration flux from gas phase to particle phase;  $F_{PG}$ : migration flux from particle phase to gas phase;  $F_{GWS\_diff}$ : diffusion fluxes from gas phase to water and/or soil phases;  $F_{GW}$ : wet deposition flux of gas phase PAHs to water and/or soil phase;  $F_{WSG\_diff}$ : diffusion fluxes from soil and/or water phases to gas phase;  $F_{PD}$ : dry deposition flux of particle phase PAHs to SPM and/or soil phase;  $F_{PW}$ : wet deposition flux of particle phase PAHs to SPM and/or soil phase;  $(1-\phi_0)E$ : emission flux of gas phase PAHs;  $\phi_0 E$ : emission flux of particle phase PAHs.)

The Figure was cited from the reference: Zhu Fu-Jie, Hu Peng-Tuan, Ma Wan-Li. A new steady-state gas-particle partitioning model of polycyclic aromatic hydrocarbons: implication for the influence of the particulate proportion in emissions. *Atmospheric Chemistry and Physics* 2023; 8583–8590.
